# Supplementary material for: Large-Scale Profiling on lncRNAs in Human Platelets: Correlation with Platelet Reactivity
Source: MDPI journal article supplement (doi:10.3390/cells11142256), 2022-07-21
Supplement: s1 [file s1]

## Supplementary Materials

Table S1. The lists of all differentially expressed known lncRNAs (Hypo vs Hper).  
(ENSG00000258689, ENSG00000277463, ENSG00000251129 and ENSG00000226708 were highlighted and selected for verification by qRT-PCR.)

| LncRNA          | length | Position                   | FoldChange | pval      | Up/Down |
|-----------------|--------|----------------------------|------------|-----------|---------|
| ENSG00000273373 | 2850   | chr1:110370154-110373003:+ | 0.4043873  | 0.0004814 | down    |
| ENSG00000228775 | 2262   | chr7:141704338-141738346:- | 0.3057867  | 0.0098213 | down    |
| ENSG00000215196 | 2941   | chr5:17130028-17217047:-   | 0.1572617  | 0.0026069 | down    |
| ENSG00000230266 | 784    | chr3:195147871-195152790:+ | 0.1501135  | 0.0001312 | down    |
| ENSG00000229951 | 3001   | chr2:28384409-28394672:-   | 0.3502648  | 0.0089311 | down    |
| ENSG00000273382 | 2888   | chr1:109087971-109090858:- | 0.3387176  | 0.0036281 | down    |
| ENSG00000258731 | 1076   | chr14:53153354-53157528:+  | 0.206406   | 0.0000324 | down    |
| ENSG00000235802 | 350    | chrX:153969325-153970087:+ | 0.2871736  | 0.0024818 | down    |
| ENSG00000247728 | 970    | chr15:30616998-30625773:-  | 0.4532838  | 0.0089271 | down    |
| ENSG00000271971 | 736    | chr8:93715378-93716113:-   | 0.183472   | 0.0079206 | down    |
| ENSG00000255468 | 762    | chr11:66347950-66364804:+  | 0.1000757  | 0.003018  | down    |
| ENSG00000248828 | 832    | chr4:143953635-144126359:+ | 0.2840857  | 0.0004102 | down    |
| ENSG00000261801 | 2358   | chr15:73908071-73928248:-  | 0.1223147  | 0.0100279 | down    |
| ENSG00000267265 | 786    | chr19:55006193-55048086:+  | 0.4877105  | 0.0002297 | down    |
| ENSG00000163915 | 1924   | chr3:185712528-185729787:+ | 0.0393154  | 0.0001959 | down    |
| ENSG00000255733 | 1791   | chr12:67989445-68234686:+  | 0.3551071  | 0.0021144 | down    |
| ENSG00000241490 | 3023   | chr3:114214313-114236204:+ | 0.2896927  | 0.0001088 | down    |
| ENSG00000249593 | 1067   | chr5:139012647-139051203:+ | 0.2001513  | 0.0004903 | down    |
| ENSG00000229931 | 635    | chr6:16761138-16762652:+   | 0.300227   | 0.0039078 | down    |
| ENSG00000254760 | 492    | chr19:51414298-51414965:+  | 0.068802   | 0.0074049 | down    |
| ENSG00000234676 | 405    | chr9:26955780-26956295:-   | 0.183472   | 0.0079206 | down    |
| ENSG00000230322 | 430    | chr10:11168922-11171376:-  | 0.137604   | 0.0008452 | down    |
| ENSG00000277089 | 1115   | chr17:36072866-36090134:+  | 0.206406   | 0.0032979 | down    |
| ENSG00000230257 | 1072   | chr7:102973522-102988856:+ | 0.3145235  | 0.006109  | down    |
| ENSG00000249635 | 3526   | chr4:106003317-106022478:- | 0.0366944  | 0.0001089 | down    |
| ENSG00000274092 | 715    | chr16:27313387-27314101:-  | 0.4892587  | 0.0056012 | down    |
| ENSG00000272181 | 418    | chr3:64019508-64019925:+   | 0.3387176  | 0.0036281 | down    |
| ENSG00000248774 | 521    | chr4:173322206-173329694:- | 0.1100832  | 0.0000863 | down    |
| ENSG00000235843 | 485    | chr10:26717635-26718778:+  | 0.308233   | 0.0024573 | down    |
| ENSG00000245105 | 2192   | chr12:9065177-9068060:+    | 0.4631087  | 1.28E-07  | down    |
| ENSG00000248544 | 1932   | chr5:157375741-157384950:- | 0.1467776  | 0.0014867 | down    |
| ENSG00000246308 | 2335   | chr11:10809297-10822931:+  | 0.183472   | 0.0079206 | down    |
| ENSG00000272502 | 1141   | chr8:120812219-120813359:+ | 0.1000757  | 0.0000274 | down    |
| ENSG00000260625 | 655    | chr16:31508471-31509256:+  | 0.1000757  | 0.003018  | down    |
| ENSG00000259985 | 1169   | chr18:31685655-31686823:+  | 0.2358926  | 0.0092809 | down    |
| ENSG00000254418 | 240    | chr11:14262846-14273691:-  | 0.1693588  | 0.0045542 | down    |
| ENSG00000263065 | 550    | chr16:15741151-15741791:+  | 0.275208   | 0.0098245 | down    |
| ENSG00000236200 | 833    | chr1:43699765-43708138:-   | 0.0846794  | 0.0009105 | down    |
| ENSG00000272195 | 1739   | chr1:244969350-244971088:- | 0.4209064  | 0.0049967 | down    |
| ENSG00000273002 | 2157   | chr1:155978799-155982986:+ | 0.4493192  | 0.0015404 | down    |
| ENSG00000271857 | 927    | chr6:45421079-45422005:-   | 0.4253215  | 0.0015603 | down    |
| ENSG00000232855 | 6103   | chr21:28439346-28674848:-  | 0.3387176  | 0.0036281 | down    |
| ENSG00000234689 | 215    | chr13:47905329-47907357:-  | 0.2896927  | 0.0062074 | down    |
| ENSG00000280303 | 2003   | chr8:140636281-140638283:+ | 0.4403329  | 0.0063268 | down    |

|                        |            |                                   |                  |                  |             |
|------------------------|------------|-----------------------------------|------------------|------------------|-------------|
| ENSG00000261079        | 2365       | chr16:74367462-74369826:+         | 0.388529         | 0.0026458        | down        |
| ENSG00000278607        | 555        | chr18:75070197-75071091:-         | 0.4717852        | 0.0026097        | down        |
| ENSG00000281852        | 4113       | chrX:71697196-71706455:+          | 0.0500378        | 4.45E-06         | down        |
| ENSG00000223511        | 445        | chrX:1732584-1755985:+            | 0.275208         | 0.0098245        | down        |
| ENSG00000271737        | 416        | chr5:134005147-134005562:+        | 0.068802         | 0.0074049        | down        |
| ENSG00000230978        | 693        | chr21:34723807-34737181:-         | 0.2446294        | 0.0037097        | down        |
| ENSG00000261584        | 1724       | chr6:26686241-26687964:+          | 0.0524206        | 7.98E-06         | down        |
| ENSG00000249069        | 735        | chr5:54320944-54415125:+          | 0.0550416        | 0.0021565        | down        |
| ENSG00000272693        | 1962       | chr7:65647010-65770810:-          | 0.4165311        | 0.0031155        | down        |
| ENSG00000248243        | 713        | chr3:130089433-130094304:-        | 0.1223147        | 0.0100279        | down        |
| ENSG00000236990        | 2287       | chr10:4051726-4089013:+           | 0.4003026        | 0.0038576        | down        |
| ENSG00000269826        | 901        | chr16:86347387-86349611:+         | 0.0611573        | 0.0000466        | down        |
| ENSG00000227674        | 1878       | chr13:63986371-64076011:-         | 0.067595         | 4.01E-24         | down        |
| ENSG00000248677        | 3364       | chr5:6686325-6707711:-            | 0.183472         | 0.0079206        | down        |
| ENSG00000245164        | 5330       | chr8:125922308-125951249:-        | 0.475864         | 2.08E-15         | down        |
| ENSG00000278740        | 619        | chr17:68188547-68189165:+         | 0.3057867        | 0.0098213        | down        |
| ENSG00000282828        | 673        | chr2:49563398-49595122:+          | 0.4433907        | 0.0001003        | down        |
| ENSG00000250548        | 5103       | chr14:61556313-61570653:-         | 0.3011711        | 2.58E-10         | down        |
| ENSG00000229656        | 1048       | chr10:32958845-33082102:+         | 0.4088805        | 0.0034736        | down        |
| ENSG00000231971        | 1360       | chr6:134428240-134520585:-        | 0.1223147        | 0.0002711        | down        |
| ENSG00000278376        | 1884       | chr11:118791254-118793137:+       | 0.4532838        | 0.0089271        | down        |
| ENSG00000273344        | 2256       | chr7:155003448-155005703:+        | 0.4281014        | 0.004454         | down        |
| ENSG00000237721        | 509        | chr21:39006648-39011329:-         | 0.068802         | 0.0074049        | down        |
| ENSG00000282961        | 12727      | chr8:127079874-127092600:+        | 0.3962996        | 0.0112037        | down        |
| ENSG00000254872        | 3139       | chr11:1049880-1055749:+           | 0.300227         | 0.0004093        | down        |
| <b>ENSG00000226708</b> | <b>269</b> | <b>chr2:123443266-123444445:-</b> | <b>0.0550416</b> | <b>0.0021565</b> | <b>down</b> |
| ENSG00000254295        | 489        | chr5:172954907-172957162:+        | 0.3387176        | 0.0003673        | down        |
| ENSG00000198547        | 5076       | chr20:32631652-32673941:-         | 0.4077156        | 0.0100789        | down        |
| ENSG00000249806        | 512        | chr4:142566019-142660950:+        | 0.068802         | 0.0074049        | down        |
| ENSG00000257151        | 4618       | chr15:25031873-25036490:+         | 0.4003026        | 0.0008481        | down        |
| ENSG00000198685        | 2697       | chr3:128572000-128576086:-        | 0.2358926        | 0.0092809        | down        |
| ENSG00000254615        | 1318       | chr8:106270144-106272899:+        | 0.275208         | 0.003893         | down        |
| ENSG00000213279        | 2379       | chr22:49572264-49575426:-         | 0.4403329        | 0.0001986        | down        |
| ENSG00000267731        | 2919       | chr17:68189884-68192802:+         | 0.3490443        | 0.000346         | down        |
| ENSG00000205663        | 2194       | chrX:3891438-3920746:-            | 0.2635795        | 2.69E-08         | down        |
| ENSG00000242659        | 303        | chr3:113746872-113747408:-        | 0.068802         | 0.0074049        | down        |
| ENSG00000269887        | 715        | chr1:164680085-164680799:+        | 0.4953745        | 0.0100409        | down        |
| ENSG00000274275        | 325        | chr18:32031035-32031359:+         | 0.275208         | 0.0098245        | down        |
| ENSG00000267749        | 2016       | chr19:2641838-2643853:-           | 0.1000757        | 0.003018         | down        |
| ENSG00000261560        | 1495       | chr16:11881075-11882569:-         | 0.1000757        | 0.003018         | down        |
| ENSG00000261288        | 572        | chr16:2554975-2556105:+           | 0.4953745        | 0.0100409        | down        |
| ENSG00000231125        | 794        | chr21:29058073-29060095:-         | 0.091736         | 0.0016569        | down        |
| ENSG00000269911        | 1490       | chrX:72777608-72779097:+          | 0.1100832        | 0.0055007        | down        |
| ENSG00000253838        | 102        | chr8:39914229-39915721:+          | 0.2555503        | 5.33E-07         | down        |
| ENSG00000260190        | 820        | chr9:136937169-136937988:-        | 0.3669441        | 0.003157         | down        |
| ENSG00000236310        | 386        | chr7:41667168-41705335:-          | 0.068802         | 0.0074049        | down        |
| ENSG00000239801        | 364        | chr3:57628810-57654918:+          | 12.109154        | 0.0013114        | up          |
| ENSG00000225981        | 498        | chr7:1459937-1464008:+            | 2.6909231        | 0.0086101        | up          |
| ENSG00000233030        | 3543       | chr1:149785659-149793020:-        | 3.1452347        | 0.0052912        | up          |
| ENSG00000235527        | 2117       | chr1:113924000-113929492:-        | 2.0444026        | 0.0067972        | up          |

|                 |      |                             |           |           |    |
|-----------------|------|-----------------------------|-----------|-----------|----|
| ENSG00000246228 | 1420 | chr8:127289817-127482139:-  | 2.9355524 | 0.000744  | up |
| ENSG00000225542 | 705  | chr3:21542816-21579959:+    | 8.2562412 | 0.0004733 | up |
| ENSG00000257696 | 418  | chr12:100143058-100144671:+ | 7.155409  | 0.0016669 | up |
| ENSG00000254733 | 411  | chr11:86431590-86622867:+   | 17.613315 | 0.0041007 | up |
| ENSG00000240005 | 482  | chr4:26859806-26860599:-    | 9.9074895 | 0.0049493 | up |
| ENSG00000274751 | 3867 | chr16:1305547-1309413:-     | 8.8066573 | 0.0096361 | up |
| ENSG00000224424 | 3447 | chr3:48847572-48851981:+    | 4.6785367 | 0.0017191 | up |
| ENSG00000230910 | 2365 | chr6:68629962-68635027:-    | 2.7520804 | 5.63E-05  | up |
| ENSG00000267296 | 2198 | chr19:33302857-33305054:+   | 2.2567059 | 0.0020595 | up |
| ENSG00000255306 | 739  | chr11:68024809-68030461:-   | 8.8066573 | 0.0002514 | up |
| ENSG00000257599 | 963  | chr12:29389294-29487488:+   | 22.016643 | 1.92E-34  | up |
| ENSG00000225721 | 580  | chr1:44759037-44775810:-    | 8.8066573 | 0.0096361 | up |
| ENSG00000259436 | 1955 | chr19:42152569-42157523:+   | 2.0365395 | 0.0002058 | up |
| ENSG00000255446 | 510  | chr11:62421845-62426724:-   | 2.3589261 | 0.0059818 | up |
| ENSG00000251139 | 628  | chr4:184813619-184821300:+  | 2.0548867 | 0.001105  | up |
| ENSG00000261758 | 3151 | chr3:136752630-136755780:+  | 4.7702727 | 0.0057369 | up |
| ENSG00000272158 | 443  | chr14:65003325-65003767:-   | 5.5041608 | 0.010717  | up |
| ENSG00000272509 | 462  | chr8:94884609-94885070:+    | 6.0545769 | 0.0057913 | up |
| ENSG00000233070 | 500  | chrY:2966844-3002626:-      | 11.008322 | 0.0025455 | up |
| ENSG00000271797 | 944  | chr5:115262505-115263448:+  | 28.621636 | 0.0001511 | up |
| ENSG00000273261 | 699  | chr3:182921240-182921938:-  | 22.016643 | 0.0010714 | up |
| ENSG00000274877 | 3231 | chr2:113237595-113240825:+  | 3.9140699 | 6.97E-05  | up |
| ENSG00000253796 | 486  | chr8:108895029-109063417:-  | 3.3024965 | 0.0064331 | up |
| ENSG00000269890 | 3955 | chr1:228270443-228274397:-  | 2.3851363 | 0.0097444 | up |
| ENSG00000247498 | 1746 | chr12:12927726-12984645:+   | 3.61702   | 0.0011947 | up |
| ENSG00000271474 | 3329 | chr4:95549129-95552457:+    | 5.5041608 | 0.010717  | up |
| ENSG00000282386 | 710  | chr1:153964361-153965070:+  | 4.4033286 | 0.0101991 | up |
| ENSG00000261351 | 2168 | chr15:66488658-66492109:-   | 2.0721547 | 0.0127911 | up |
| ENSG00000274227 | 627  | chr12:112018804-112019430:- | 2.6419972 | 0.0068202 | up |
| ENSG00000228201 | 389  | chr16:648473-649200:-       | 3.3024965 | 0.0128668 | up |
| ENSG00000214772 | 657  | chr12:14665655-14757963:+   | 5.5041608 | 0.010717  | up |
| ENSG00000233672 | 1707 | chr13:50862172-50910764:-   | 4.1831622 | 0.0015722 | up |
| ENSG00000281128 | 873  | chr9:33677268-33688011:+    | 5.5041608 | 0.010717  | up |
| ENSG00000226609 | 420  | chr9:112748902-112750456:-  | 9.9074895 | 0.0049493 | up |
| ENSG00000224649 | 327  | chr21:29182027-29187795:-   | 2.2802952 | 0.008847  | up |
| ENSG00000227407 | 529  | chr19:54430654-54434698:-   | 2.3851363 | 0.0097444 | up |
| ENSG00000276136 | 848  | chr12:32000375-32001222:+   | 2.3667891 | 0.0009637 | up |
| ENSG00000271324 | 502  | chr3:33793644-33794145:-    | 7.155409  | 0.0016669 | up |
| ENSG00000232850 | 2100 | chr9:128128529-128130628:+  | 11.008322 | 0.0025455 | up |
| ENSG00000198468 | 2525 | chr1:212852108-212858088:-  | 4.4033286 | 8.60E-06  | up |
| ENSG00000257900 | 548  | chr14:45377268-45389286:+   | 2.3484419 | 0.0046937 | up |
| ENSG00000228106 | 768  | chr1:222815022-222837384:+  | 2.1015887 | 0.0037663 | up |
| ENSG00000212743 | 2447 | chr10:6350316-6352762:+     | 2.2934003 | 0.0005474 | up |
| ENSG00000228437 | 1148 | chr1:221966341-221984964:+  | 4.7702727 | 0.0057369 | up |
| ENSG00000259005 | 589  | chr14:74474007-74474864:-   | 2.3589261 | 0.0059818 | up |
| ENSG00000227925 | 423  | chr1:221827666-221840666:-  | 7.7058251 | 0.0008894 | up |
| ENSG00000251615 | 3249 | chr4:8355090-8358338:-      | 2.0793496 | 0.0099914 | up |
| ENSG00000272360 | 462  | chr3:58490830-58491291:-    | 2.8896844 | 0.0068726 | up |
| ENSG00000255363 | 559  | chr11:76628096-76630363:-   | 2.0746452 | 0.0020369 | up |
| ENSG00000250072 | 3091 | chr5:149063317-149109787:+  | 4.5868007 | 0.0001623 | up |

|                        |            |                                  |                  |                  |           |
|------------------------|------------|----------------------------------|------------------|------------------|-----------|
| ENSG00000203729        | 740        | chr1:182407621-182414815:+       | 17.613315        | 0.0041007        | up        |
| ENSG00000256433        | 1803       | chr12:6393905-6396148:+          | 2.2016643        | 0.0079045        | up        |
| ENSG00000237357        | 2579       | chr9:42566679-42569353:-         | 9.9074895        | 0.0049493        | up        |
| ENSG00000271789        | 1385       | chr6:111297126-111298510:+       | 2.2016643        | 0.0014497        | up        |
| ENSG00000275759        | 590        | chr12:118428281-118428870:+      | 13.209986        | 0.000677         | up        |
| ENSG00000253139        | 555        | chr8:56536758-56540497:-         | 5.1372168        | 0.0032026        | up        |
| <b>ENSG00000258689</b> | <b>602</b> | <b>chr14:70698698-70712153:+</b> | <b>17.613315</b> | <b>0.0041007</b> | <b>up</b> |
| ENSG00000248489        | 478        | chr5:98929171-98995013:+         | 3.8529126        | 0.0090385        | up        |
| ENSG00000254837        | 2493       | chr11:74493366-74498533:+        | 2.2016643        | 0.0129707        | up        |
| ENSG00000258216        | 547        | chr12:89882665-89989289:+        | 8.8066573        | 0.0096361        | up        |
| ENSG00000255621        | 2403       | chr12:13000451-13040679:+        | 11.008322        | 0.0025455        | up        |
| ENSG00000236611        | 346        | chr22:23326616-23328493:+        | 6.604993         | 0.0031134        | up        |
| ENSG00000267940        | 1353       | chr11:6201901-6203253:-          | 2.5254385        | 0.0008811        | up        |
| ENSG00000226032        | 331        | chr6:159064728-159065273:-       | 4.4033286        | 0.0101991        | up        |
| ENSG00000268518        | 626        | chr19:50486810-50487638:-        | 2.0181923        | 0.0015433        | up        |
| <b>ENSG00000277463</b> | <b>423</b> | <b>chr17:62626031-62626453:+</b> | <b>17.613315</b> | <b>0.0041007</b> | <b>up</b> |
| ENSG00000269051        | 545        | chr19:53197111-53211015:+        | 2.715386         | 0.0006027        | up        |
| ENSG00000226816        | 2033       | chr7:23206013-23208045:+         | 2.4375569        | 0.004011         | up        |
| ENSG00000248636        | 695        | chr12:119387987-119668079:-      | 2.0793496        | 0.0016044        | up        |
| ENSG00000214145        | 2880       | chr3:194296465-194312803:-       | 6.0545769        | 0.0057913        | up        |
| ENSG00000273211        | 479        | chr3:48985485-48985963:-         | 17.613315        | 0.0041007        | up        |
| ENSG00000272203        | 753        | chr5:132817248-132818000:-       | 9.9074895        | 0.0049493        | up        |
| ENSG00000232324        | 555        | chr19:53864763-53866140:+        | 8.8066573        | 0.0096361        | up        |
| ENSG00000257747        | 1372       | chr12:81953719-81993133:+        | 2.7520804        | 0.0108525        | up        |
| ENSG00000234902        | 823        | chr2:207186717-207236066:-       | 2.6909231        | 0.0086101        | up        |
| <b>ENSG00000251129</b> | <b>734</b> | <b>chr4:31997397-32155406:+</b>  | <b>4.1831622</b> | <b>0.0015722</b> | <b>up</b> |
| ENSG00000254952        | 385        | chr11:60159687-60160822:-        | 2.2016643        | 0.0129707        | up        |
| ENSG00000270000        | 431        | chr14:74471930-74472360:-        | 4.4033286        | 2.73E-05         | up        |
| ENSG00000237803        | 1923       | chr2:37826247-37876274:-         | 2.1303141        | 5.43E-11         | up        |
| ENSG00000250057        | 394        | chr4:83233512-83247213:-         | 2.0580775        | 0.0041866        | up        |
| ENSG00000256955        | 770        | chr12:131857420-131864538:+      | 3.4859685        | 0.0038902        | up        |
| ENSG00000166770        | 1521       | chr19:56477250-56500666:+        | 2.6419972        | 1.89E-05         | up        |
| ENSG00000224050        | 590        | chr22:32273420-32277186:+        | 5.5041608        | 0.010717         | up        |
| ENSG00000266934        | 716        | chr17:61382785-61384680:+        | 3.5226629        | 0.0077113        | up        |
| ENSG00000276248        | 3362       | chr13:113527260-113530621:+      | 2.2016643        | 0.0101178        | up        |
| ENSG00000270077        | 554        | chr8:97144170-97144723:+         | 2.8896844        | 0.0001321        | up        |
| ENSG00000267285        | 574        | chr12:1385833-1386987:+          | 2.987973         | 0.0085391        | up        |
| ENSG00000259735        | 497        | chr15:59348648-59359889:-        | 2.5018913        | 0.0082377        | up        |
| ENSG00000224356        | 2367       | chr13:100535741-100587146:-      | 2.2016643        | 0.0129707        | up        |
| ENSG00000266371        | 2780       | chr17:31133182-31138518:+        | 2.2567059        | 0.0020595        | up        |
| ENSG00000260293        | 5616       | chr16:2476558-2482173:+          | 15.41165         | 0.0081245        | up        |
| ENSG00000259999        | 427        | chr16:75321890-75325048:-        | 5.2289528        | 0.000549         | up        |
| ENSG00000224992        | 1019       | chr9:132768965-132770212:-       | 22.016643        | 0.0010714        | up        |
| ENSG00000277558        | 583        | chr20:34476205-34476787:+        | 2.987973         | 0.0085391        | up        |
| ENSG00000229832        | 496        | chr1:212357418-212358353:+       | 19.814979        | 0.0020877        | up        |
| ENSG00000229521        | 428        | chr13:77080511-77081190:-        | 2.2016643        | 0.0061839        | up        |
| ENSG00000276107        | 733        | chr15:39586561-39587293:+        | 2.0677793        | 2.26E-07         | up        |
| ENSG00000215533        | 989        | chr21:29193480-29288205:+        | 2.0548867        | 0.001105         | up        |
| ENSG00000251405        | 1992       | chr5:157362615-157460078:-       | 4.4033286        | 0.0101991        | up        |

Table S2. The lists of all differentially expressed novel lncRNAs (Hypo vs Hper)( lnc\_417 and lnc\_1129 were highlighted and selected for verification by qRT-PCR.)

| Gene           | Hypo_normalize  | Hyper_normalize | FoldChange      | Log2FoldChange  | pval            | Up/Down     |
|----------------|-----------------|-----------------|-----------------|-----------------|-----------------|-------------|
| lnc_330        | 290.5803        | 11080.29        | 0.026225        | -5.25291        | 0               | down        |
| lnc_196        | 95.03254        | 2985.677        | 0.031829        | -4.97349        | 0               | down        |
| lnc_793        | 619.5391        | 4182.571        | 0.148124        | -2.75512        | 0               | down        |
| lnc_84         | 16.44794        | 2290.494        | 0.007181        | -7.12161        | 1.53E-299       | down        |
| lnc_889        | 169.962         | 1059.169        | 0.160467        | -2.63965        | 2.17E-91        | down        |
| lnc_305        | 427.6464        | 1365.771        | 0.313117        | -1.67523        | 7.69E-67        | down        |
| lnc_270        | 40.20607        | 552.5387        | 0.072766        | -3.78059        | 2.31E-66        | down        |
| lnc_710        | 246.7191        | 970.6318        | 0.254184        | -1.97605        | 9.80E-60        | down        |
| lnc_57         | 511.7137        | 1231.325        | 0.41558         | -1.2668         | 2.00E-40        | down        |
| lnc_9          | 98.68764        | 455.8035        | 0.216514        | -2.20747        | 4.20E-33        | down        |
| lnc_596        | 681.6757        | 1383.806        | 0.492609        | -1.02148        | 1.62E-32        | down        |
| lnc_612        | 537.2994        | 1118.194        | 0.480506        | -1.05737        | 4.83E-28        | down        |
| lnc_677        | 12.79284        | 211.5059        | 0.060485        | -4.04729        | 1.40E-27        | down        |
| <b>lnc_417</b> | <b>0.913774</b> | <b>196.7497</b> | <b>0.004644</b> | <b>-7.75031</b> | <b>3.69E-26</b> | <b>down</b> |
| lnc_896        | 12.79284        | 186.9122        | 0.068443        | -3.86895        | 6.35E-24        | down        |
| lnc_187        | 354.5445        | 796.8363        | 0.44494         | -1.16832        | 9.74E-24        | down        |
| lnc_841        | 63.96421        | 298.4037        | 0.214355        | -2.22193        | 2.10E-22        | down        |
| lnc_814        | 0.913774        | 141.0039        | 0.00648         | -7.26968        | 6.79E-20        | down        |
| lnc_608        | 274.1323        | 568.9345        | 0.481835        | -1.05339        | 5.92E-15        | down        |
| lnc_749        | 32.89588        | 167.2372        | 0.196702        | -2.34592        | 4.99E-14        | down        |
| lnc_1084       | 16.44794        | 118.0498        | 0.13933         | -2.84342        | 1.97E-12        | down        |
| lnc_1025       | 0.913774        | 70.50197        | 0.012961        | -6.26968        | 3.54E-11        | down        |
| lnc_938        | 16.44794        | 103.2936        | 0.159235        | -2.65077        | 2.23E-10        | down        |
| lnc_227        | 102.3427        | 252.4954        | 0.405325        | -1.30285        | 7.34E-10        | down        |
| lnc_1232       | 91.37744        | 229.5413        | 0.398087        | -1.32884        | 2.49E-09        | down        |
| lnc_607        | 74.9295         | 201.6684        | 0.371548        | -1.42838        | 3.54E-09        | down        |
| lnc_1154       | 7.310195        | 70.50197        | 0.103688        | -3.26968        | 6.32E-09        | down        |
| lnc_483        | 29.24078        | 116.4102        | 0.251187        | -1.99316        | 1.38E-08        | down        |
| lnc_287        | 21.93059        | 91.81652        | 0.238852        | -2.06581        | 2.48E-07        | down        |
| lnc_649        | 29.24078        | 101.654         | 0.28765         | -1.79761        | 7.48E-07        | down        |
| lnc_626        | 47.51627        | 132.806         | 0.357787        | -1.48283        | 8.34E-07        | down        |
| lnc_648        | 23.75813        | 90.17694        | 0.263461        | -1.92434        | 1.06E-06        | down        |
| lnc_402        | 47.51627        | 131.1665        | 0.362259        | -1.46491        | 1.22E-06        | down        |
| lnc_364        | 74.9295         | 173.7956        | 0.431136        | -1.21379        | 1.34E-06        | down        |
| lnc_1140       | 20.10304        | 77.0603         | 0.260874        | -1.93857        | 5.78E-06        | down        |
| lnc_522        | 20.10304        | 77.0603         | 0.260874        | -1.93857        | 5.78E-06        | down        |
| lnc_542        | 21.93059        | 78.69988        | 0.278661        | -1.84342        | 9.44E-06        | down        |
| lnc_261        | 87.72234        | 181.9935        | 0.482008        | -1.05287        | 1.02E-05        | down        |
| lnc_1261       | 38.37853        | 101.654         | 0.377541        | -1.4053         | 3.46E-05        | down        |
| lnc_477        | 16.44794        | 60.66449        | 0.27113         | -1.88295        | 7.97E-05        | down        |
| lnc_906        | 52.99892        | 118.0498        | 0.448954        | -1.15536        | 0.00012769      | down        |
| lnc_1273       | 9.137744        | 42.6291         | 0.214355        | -2.22193        | 0.00023322      | down        |
| lnc_202        | 10.96529        | 45.90826        | 0.238852        | -2.06581        | 0.00026431      | down        |
| lnc_633        | 3.655098        | 29.51245        | 0.123849        | -3.01334        | 0.00029415      | down        |
| lnc_770        | 9.137744        | 40.98952        | 0.222929        | -2.16535        | 0.00038332      | down        |

|          |          |          |          |          |            |      |
|----------|----------|----------|----------|----------|------------|------|
| Inc_296  | 21.93059 | 63.94365 | 0.342967 | -1.54386 | 0.00042808 | down |
| Inc_603  | 18.27549 | 57.38533 | 0.31847  | -1.65077 | 0.00046143 | down |
| Inc_209  | 45.68872 | 100.0144 | 0.456821 | -1.1303  | 0.00053099 | down |
| Inc_192  | 9.137744 | 39.34994 | 0.232217 | -2.10645 | 0.00062703 | down |
| Inc_1090 | 7.310195 | 34.4312  | 0.212313 | -2.23573 | 0.00090053 | down |
| Inc_848  | 18.27549 | 54.10617 | 0.337771 | -1.56588 | 0.00106189 | down |
| Inc_883  | 40.20607 | 86.89778 | 0.462682 | -1.11191 | 0.00143744 | down |
| Inc_715  | 49.34382 | 100.0144 | 0.493367 | -1.01927 | 0.00144764 | down |
| Inc_1148 | 14.62039 | 45.90826 | 0.31847  | -1.65077 | 0.00173351 | down |
| Inc_343  | 10.96529 | 39.34994 | 0.278661 | -1.84342 | 0.00173505 | down |
| Inc_1262 | 7.310195 | 31.15204 | 0.234662 | -2.09134 | 0.00245574 | down |
| Inc_332  | 10.96529 | 37.71036 | 0.290777 | -1.78202 | 0.00273707 | down |
| Inc_801  | 23.75813 | 59.02491 | 0.40251  | -1.3129  | 0.00274226 | down |
| Inc_480  | 34.72343 | 73.78114 | 0.470627 | -1.08734 | 0.00392628 | down |
| Inc_1008 | 25.58568 | 59.02491 | 0.433473 | -1.20599 | 0.00506644 | down |
| Inc_750  | 36.55098 | 73.78114 | 0.495397 | -1.01334 | 0.00648022 | down |
| Inc_679  | 0.913774 | 13.11665 | 0.069665 | -3.84342 | 0.00767553 | down |
| Inc_313  | 3.655098 | 19.67497 | 0.185774 | -2.42838 | 0.00838059 | down |
| Inc_647  | 27.41323 | 59.02491 | 0.464435 | -1.10645 | 0.00889166 | down |
| Inc_517  | 20.10304 | 47.54784 | 0.422796 | -1.24197 | 0.01003827 | down |
| Inc_1000 | 0.913774 | 11.47707 | 0.079617 | -3.65077 | 0.01431555 | down |
| Inc_523  | 23.75813 | 50.827   | 0.467431 | -1.09717 | 0.01589868 | down |
| Inc_259  | 9.137744 | 27.87287 | 0.327836 | -1.60895 | 0.016564   | down |
| Inc_954  | 7.310195 | 24.59371 | 0.297238 | -1.75031 | 0.01687685 | down |
| Inc_1207 | 21.93059 | 47.54784 | 0.461232 | -1.11644 | 0.01802096 | down |
| Inc_965  | 20.10304 | 44.26868 | 0.454114 | -1.13887 | 0.02039499 | down |
| Inc_1147 | 61166.23 | 9181.652 | 6.661789 | 2.73591  | 0          | up   |
| Inc_94   | 5478.991 | 6.558323 | 835.4257 | 9.706368 | 0          | up   |
| Inc_471  | 3200.038 | 78.69988 | 40.66128 | 5.345584 | 0          | up   |
| Inc_1285 | 5674.539 | 1733.037 | 3.274333 | 1.711201 | 2.22E-280  | up   |
| Inc_586  | 1478.487 | 18.03539 | 81.977   | 6.357147 | 1.68E-201  | up   |
| Inc_290  | 1780.033 | 186.9122 | 9.523362 | 3.251471 | 1.97E-186  | up   |
| Inc_880  | 1160.494 | 42.6291  | 27.22304 | 4.766756 | 8.35E-155  | up   |
| Inc_1185 | 1019.772 | 14.75623 | 69.10793 | 6.110779 | 1.73E-140  | up   |
| Inc_1003 | 1118.46  | 72.14155 | 15.50368 | 3.954539 | 2.54E-136  | up   |
| Inc_1100 | 1560.727 | 339.3932 | 4.598579 | 2.201188 | 1.13E-108  | up   |
| Inc_655  | 515.3688 | 6.558323 | 78.5824  | 6.296134 | 1.23E-71   | up   |
| Inc_4    | 1668.552 | 631.2386 | 2.643299 | 1.402339 | 5.06E-63   | up   |
| Inc_756  | 369.1649 | 6.558323 | 56.28952 | 5.814794 | 3.20E-52   | up   |
| Inc_153  | 509.8861 | 73.78114 | 6.910793 | 2.788851 | 1.60E-47   | up   |
| Inc_1107 | 498.9208 | 77.0603  | 6.474421 | 2.694751 | 5.91E-45   | up   |
| Inc_949  | 749.295  | 200.0289 | 3.745935 | 1.905326 | 2.10E-44   | up   |
| Inc_1007 | 1337.766 | 559.0971 | 2.392725 | 1.258655 | 2.37E-43   | up   |
| Inc_997  | 643.2972 | 162.3185 | 3.963179 | 1.986658 | 1.87E-40   | up   |
| Inc_467  | 453.2321 | 104.9332 | 4.319245 | 2.110779 | 3.19E-31   | up   |
| Inc_742  | 855.2929 | 345.9515 | 2.472291 | 1.305848 | 6.83E-30   | up   |
| Inc_252  | 266.8221 | 45.90826 | 5.812072 | 2.539053 | 2.31E-23   | up   |
| Inc_1149 | 179.0998 | 24.59371 | 7.282341 | 2.864402 | 3.33E-18   | up   |
| Inc_531  | 168.1345 | 26.23329 | 6.409203 | 2.680145 | 3.86E-16   | up   |

|                 |                 |                |                 |                 |                 |           |
|-----------------|-----------------|----------------|-----------------|-----------------|-----------------|-----------|
| Inc_657         | 126.1009        | 9.837485       | 12.81841        | 3.680145        | 3.88E-16        | up        |
| Inc_864         | 416.6811        | 191.831        | 2.172127        | 1.119108        | 2.28E-12        | up        |
| Inc_1051        | 215.6508        | 65.58323       | 3.2882          | 1.717298        | 2.91E-12        | up        |
| Inc_423         | 138.8937        | 31.15204       | 4.458576        | 2.156583        | 6.99E-11        | up        |
| <b>Inc_1129</b> | <b>58.48156</b> | <b>0.81979</b> | <b>71.33721</b> | <b>6.156583</b> | <b>1.55E-09</b> | <b>up</b> |
| Inc_75          | 129.756         | 32.79162       | 3.956986        | 1.984402        | 2.30E-09        | up        |
| Inc_458         | 52.99892        | 0.81979        | 64.64935        | 6.014564        | 8.57E-09        | up        |
| Inc_1101        | 51.17137        | 0.81979        | 62.42006        | 5.963938        | 1.53E-08        | up        |
| Inc_347         | 60.30911        | 6.558323       | 9.195813        | 3.200977        | 1.03E-07        | up        |
| Inc_1272        | 191.8926        | 78.69988       | 2.438284        | 1.285866        | 1.07E-07        | up        |
| Inc_1132        | 42.03362        | 0.81979        | 51.27362        | 5.680145        | 2.89E-07        | up        |
| Inc_519         | 51.17137        | 4.918742       | 10.40334        | 3.378975        | 5.23E-07        | up        |
| Inc_79          | 38.37853        | 0.81979        | 46.81505        | 5.5489          | 9.62E-07        | up        |
| Inc_858         | 206.513         | 96.73527       | 2.134827        | 1.094119        | 1.24E-06        | up        |
| Inc_766         | 67.61931        | 13.11665       | 5.155228        | 2.366036        | 1.48E-06        | up        |
| Inc_663         | 49.34382        | 6.558323       | 7.523847        | 2.91147         | 4.15E-06        | up        |
| Inc_870         | 63.96421        | 13.11665       | 4.876567        | 2.285866        | 4.51E-06        | up        |
| Inc_157         | 51.17137        | 8.197904       | 6.242006        | 2.64201         | 8.29E-06        | up        |
| Inc_1036        | 113.308         | 42.6291        | 2.657997        | 1.41034         | 1.17E-05        | up        |
| Inc_1215        | 109.6529        | 40.98952       | 2.675146        | 1.419617        | 1.47E-05        | up        |
| Inc_69          | 65.79176        | 16.39581       | 4.012718        | 2.00458         | 1.84E-05        | up        |
| Inc_571         | 29.24078        | 0.81979        | 35.66861        | 5.156583        | 2.10E-05        | up        |
| Inc_58          | 137.0662        | 60.66449       | 2.259413        | 1.175948        | 2.83E-05        | up        |
| Inc_892         | 29.24078        | 1.639581       | 17.8343         | 4.156583        | 4.55E-05        | up        |
| Inc_599         | 124.2733        | 54.10617       | 2.296842        | 1.199652        | 5.12E-05        | up        |
| Inc_132         | 62.13666        | 18.03539       | 3.445263        | 1.784614        | 0.00011838      | up        |
| Inc_286         | 45.68872        | 9.837485       | 4.64435         | 2.215477        | 0.00014296      | up        |
| Inc_1274        | 40.20607        | 8.197904       | 4.904433        | 2.294086        | 0.00026832      | up        |
| Inc_1188        | 113.308         | 52.46659       | 2.159623        | 1.110779        | 0.00027658      | up        |
| Inc_1208        | 67.61931        | 24.59371       | 2.749455        | 1.459146        | 0.00051305      | up        |
| Inc_600         | 40.20607        | 9.837485       | 4.087028        | 2.031052        | 0.00073348      | up        |
| Inc_366         | 34.72343        | 8.197904       | 4.235647        | 2.082582        | 0.00142721      | up        |
| Inc_918         | 34.72343        | 9.837485       | 3.529706        | 1.819548        | 0.00354274      | up        |
| Inc_555         | 58.48156        | 24.59371       | 2.377907        | 1.249692        | 0.0041159       | up        |
| Inc_849         | 58.48156        | 24.59371       | 2.377907        | 1.249692        | 0.0041159       | up        |
| Inc_567         | 16.44794        | 1.639581       | 10.0318         | 3.326508        | 0.00471254      | up        |
| Inc_936         | 60.30911        | 26.23329       | 2.298953        | 1.200977        | 0.004746        | up        |
| Inc_857         | 23.75813        | 4.918742       | 4.830124        | 2.27206         | 0.00535349      | up        |
| Inc_149         | 20.10304        | 3.279162       | 6.130542        | 2.616015        | 0.00545382      | up        |
| Inc_406         | 40.20607        | 14.75623       | 2.724685        | 1.44609         | 0.00779771      | up        |
| Inc_581         | 34.72343        | 11.47707       | 3.025462        | 1.597156        | 0.00780513      | up        |
| Inc_327         | 25.58568        | 6.558323       | 3.901254        | 1.963938        | 0.00840967      | up        |
| Inc_234         | 25.58568        | 6.558323       | 3.901254        | 1.963938        | 0.00840967      | up        |
| Inc_946         | 36.55098        | 13.11665       | 2.78661         | 1.478511        | 0.0099022       | up        |
| Inc_879         | 51.17137        | 22.95413       | 2.229288        | 1.156583        | 0.01159389      | up        |
| Inc_796         | 38.37853        | 14.75623       | 2.600836        | 1.378975        | 0.01214571      | up        |
| Inc_1192        | 40.20607        | 16.39581       | 2.452217        | 1.294086        | 0.01450201      | up        |
| Inc_1281        | 47.51627        | 21.31455       | 2.229288        | 1.156583        | 0.01499729      | up        |
| Inc_280         | 29.24078        | 9.837485       | 2.972384        | 1.57162         | 0.01582377      | up        |

|          |          |          |          |          |            |    |
|----------|----------|----------|----------|----------|------------|----|
| lnc_760  | 20.10304 | 4.918742 | 4.087028 | 2.031052 | 0.01695367 | up |
| lnc_1181 | 12.79284 | 1.639581 | 7.802508 | 2.963938 | 0.01804505 | up |

**Table S3. The primers used in the qRT-PCR.**

| lncRNA name         | Genetic location               | lengths(nt) | Quantitative PCR primer pairs                                                    |
|---------------------|--------------------------------|-------------|----------------------------------------------------------------------------------|
| ENSG0000025868<br>9 | chr14:70698698-<br>70712153:+  | 602         | Forward:5'-CAAGCCCACTGTGCTGATTT-3'<br>Reverse: 5'-GAGCCCAGGAGTTTGAGACC-3'        |
| ENSG0000027746<br>3 | chr17:62626031-<br>62626453:+  | 423         | Forward:5'-GGAGCCACAGCCACCAGAAG-3'<br>Reverse: 5'-TGGAAAGGGTCCCATTAGCC-3'        |
| ENSG0000025112<br>9 | chr4:31997397-32155406:+       | 734         | Forward:5'-GGGCAGACTACCCACCTAAC-3'<br>Reverse: 5'-AGGAGGCTGAGATGGATGAA-3'        |
| ENSG0000022670<br>8 | chr2:123443266-<br>123444445:- | 269         | Forward:5'-GCTGCTTCTTCCAACCTCAG-3'<br>Reverse: 5'-TTCTACACTTCCATTTCATTA-3'       |
| lnc1129             | chr20:45435272-45448325:-      | 1794        | Forward:5'-ATGACCATCTTCTTATTGACCCTC-3'<br>Reverse: 5'-CCTGGCTCACTCCTGCTTCT-3'    |
| lnc417              | chr7:19018-31194:-             | 600         | Forward:5'-AAACTGTGAGCAAGAGCGTCTG-3'<br>Reverse: 5'-GCCATCAATCATTTTCATTAGCGTA-3' |
